# Supplementary material
Source: publisher site journal article supplement (https://www.spandidos-publications.com/4823/downloadSupplementary)

Figure S1. Comparison of baseline  $I_{Ca-L}$  and  $I_{to}$  in the LA and RA myocytes. (A) Tracings and current-voltage relationship of  $I_{Ca-L}$  in the LA (n=11) and RA (n=12) myocytes. (B) Tracings and current-voltage relationship of  $I_{to}$  in the LA (n=9) and RA (n=10) myocytes. Insets in the current traces show various clamp protocols. \* $P<0.05$ , \*\* $P<0.01$ , \*\*\* $P<0.005$  compared with LA group at same mV.  $I_{Ca-L}$ ,  $Ca^{2+}$  current;  $I_{to}$ , transient outward  $K^+$  current; LA, left atrium; RA, right atrium.

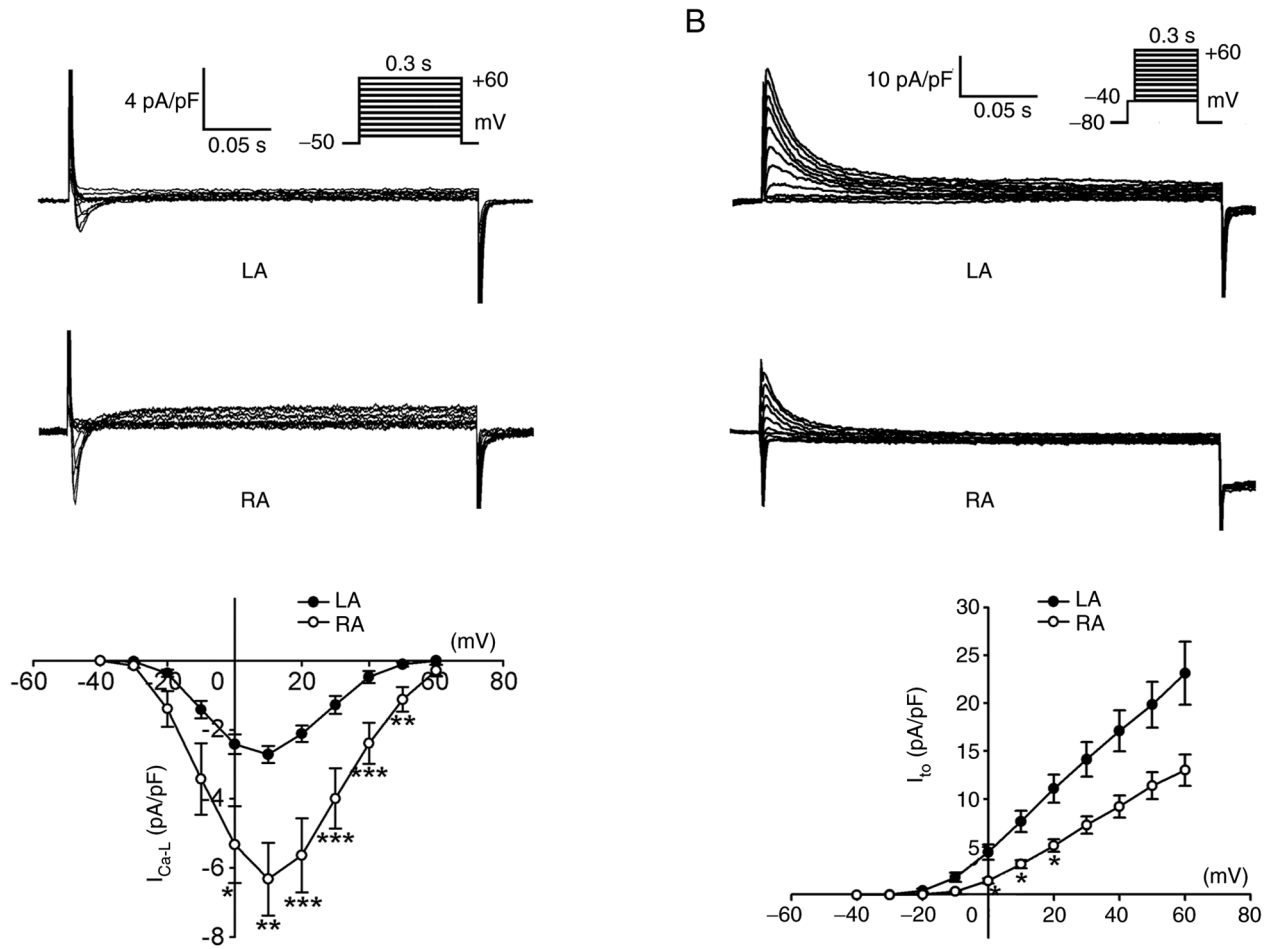

Supplement: Supplementary file 1 [file downloadSupplementary]
